# Supplementary material for: An Integrated Artificial Cilia Based Microfluidic Device for Micropumping and Micromixing Applications
Source: MDPI journal article supplement (doi:10.3390/mi8090260), 2017-08-24
Supplement: s1 [file s1]

# Supplementary Materials: An Integrated Artificial Cilia Based Microfluidic Device for Micropumping and Micromixing Applications

Yu-An Wu, Bivas Panigrahi, Yueh-Hsun Lu and Chia-Yuan Chen

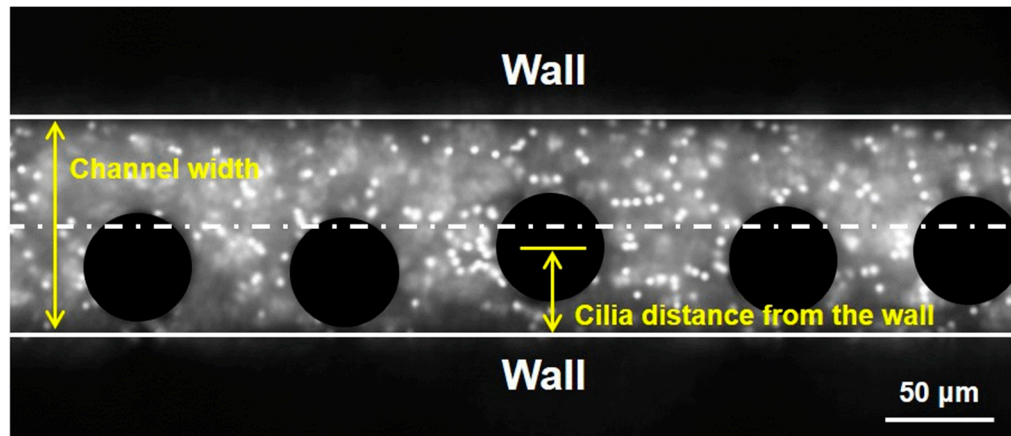

**Figure S1.** The array of artificial cilia situated closer to one microchannel wall due to the residual stress induced on them during the microfabrication procedure. Corresponding to the channel width of 100  $\mu\text{m}$  the average artificial cilia distance from the closest wall found to be  $40.03 \pm 8.79 \mu\text{m}$ . The position of the artificial cilia has a crucial role to play towards the microp propulsion by inducing asymmetry on the flow field due to the influence of the wall while the cilia beats near to it.

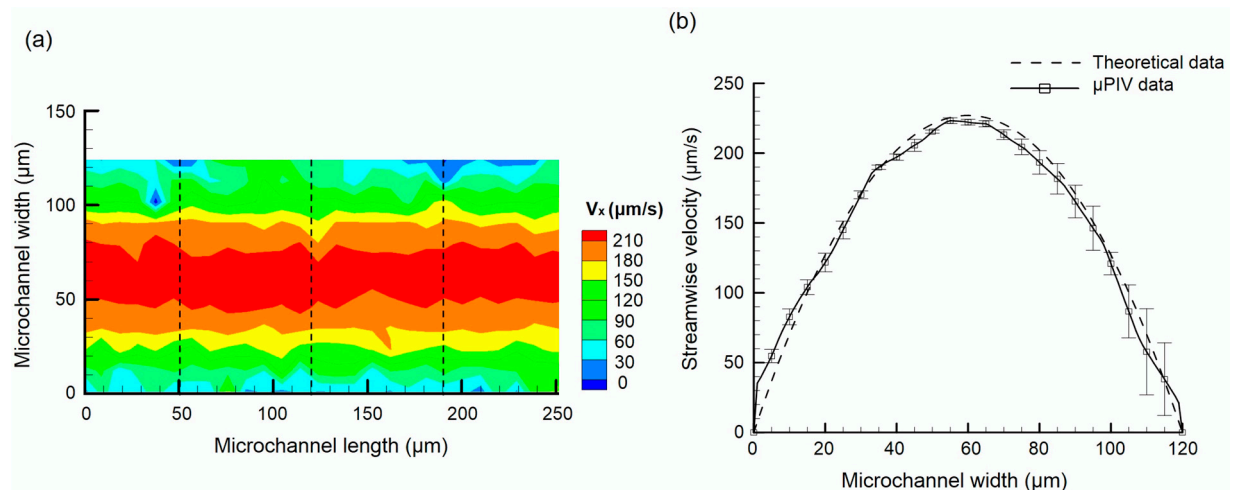

**Figure S2.** (a) Velocity contour along the X-direction on the top plane depicts the maximum velocity at the center of the plane. (b) Comparison between theoretical data and  $\mu\text{PIV}$  analysis data at a plane near the top of the microchannel illustrates a high degree of relevance. As illustrated both the data exhibit a high correlation of  $R^2 = 0.99$ .
